# Supplementary material for: Association of Preoperative Serum Carcinoembryonic Antigen and Gastric Cancer Recurrence: A Large Cohort Study
Source: PubMed Central journal article supplement (PMC7738990; doi:10.7150/jca.47899), 2021-01-01
Supplement: jcav12p0397s1.pdf [file jcav12p0397s1.pdf]

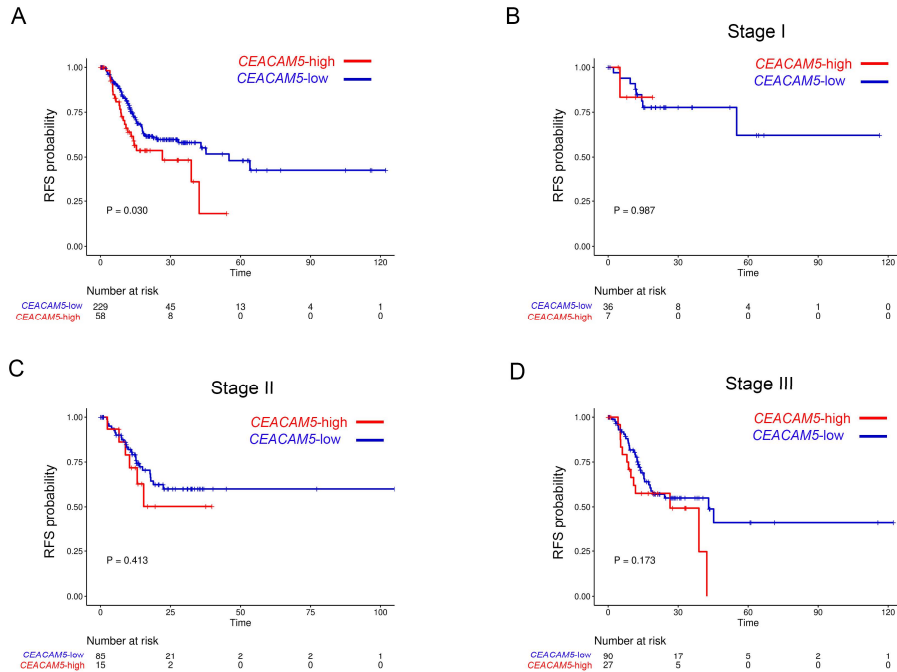

**Figure S1 Analysis of association between *CEACAM5* mRNA level and recurrence-free survival (RFS) in TCGA.**

(A) RFS in all stage I-III patients. (B-D) RFS in separate TNM stages. A top 20% cut-off of *CEACAM5* mRNA level was used to divide patients into *CEACAM5* high and low groups.

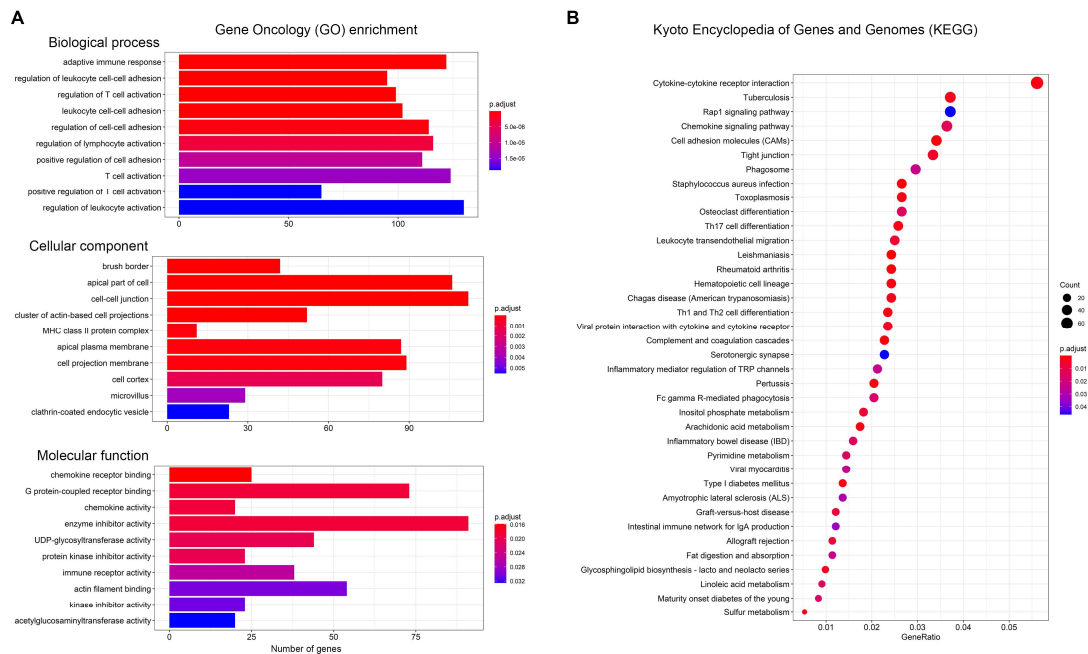

**Figure S2 In silico analyses of possible mechanisms associated with CEA.**

(A) Gene Ontology (GO) enrichment analysis. Top 10 of each category were shown. (B) Kyoto Encyclopedia of Genes and Genomes (KEGG) pathways analyses. Pathways with an adjusted-*P* value less than 0.05 were shown.
